# Supplementary material
Source: Springer Nature journal article supplement (https://www.springermedizin.de/resource/supplementary/12865_2008_257_MOESM4_ESM.pdf/9427614)

**A.**

|  |         |  |      |  |          |  |  |
|--|---------|--|------|--|----------|--|--|
|  | 103/BCL |  |      |  | BM pre-B |  |  |
|  | 34°C    |  | 39°C |  |          |  |  |
|  | 2       |  |      |  |          |  |  |

Presence  
of Ligase

|  |   |   |   |   |   |   |                  |
|--|---|---|---|---|---|---|------------------|
|  | + | - | + | - | + | - | H <sub>2</sub> O |
|--|---|---|---|---|---|---|------------------|

1000 bp

500 bp

400 bp

300 bp

200 bp

100 bp

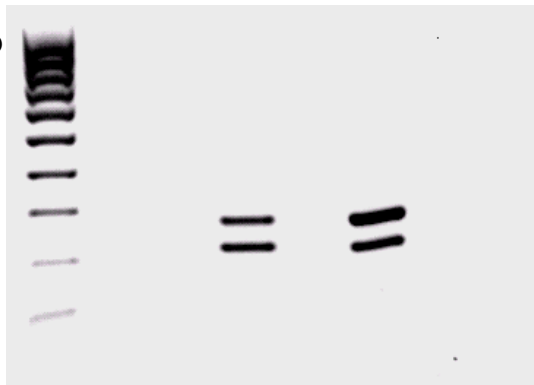**B.**

Days at  
39° C

103/BCL2

|   |   |   |   |   |   |   |   |
|---|---|---|---|---|---|---|---|
| 0 | 0 | 1 | 3 | 5 | 1 | 3 | 5 |
|---|---|---|---|---|---|---|---|

Presence  
of Ligase

|   |   |   |   |   |   |   |   |
|---|---|---|---|---|---|---|---|
| - | + | - | - | - | + | + | + |
|---|---|---|---|---|---|---|---|

Jk4

Vκ2 cRS

Vκ5 cRS

Vκ6 cRS

Vκ8 cRS

Vκ17 cRS

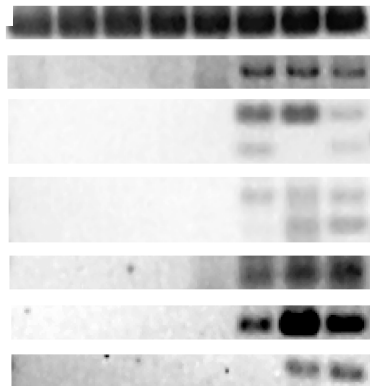

Supplement: MOESM4 [file 9427614]
